# Supplementary material
Source: PubMed Central journal article supplement (PMC3488088)
Supplement: supp_M112.390153_jbc.M112.390153-2.pdf [file supp_M112.390153_jbc.M112.390153-2.pdf]

**Table S1:** Contacts of the residues of the VgrG1-ACD N-terminus with the core of the enzyme in the apo- and holo- forms. The distances are given in Å. Hb : hydrogen bond; sb : salt bridge ; vdw : van der Waals interaction. ASA : accessible surface area ; BSA : buried surface area. Nv : not visible.

| N-term                 | Core apo | Distance / type | BSA/ASA (%)        | Core holo          | Distance / type | BSA/ASA (%) |
|------------------------|----------|-----------------|--------------------|--------------------|-----------------|-------------|
| Thr -2                 | Lys 260  | 2.74 / hb       | 60                 | nv                 | nv              | -           |
| Lys -1                 | Glu 18   | 2.50 / sb       | 85                 | nv                 | nv              | -           |
| Ala 0                  | Gln 32   | 3.3 /vdw        | 45                 | Thr 133            | 3.5 / vdw       | 21          |
| Thr 1                  | Arg 268  | 3.20 / hb       | 83                 | Lys 33             | 3.5 / vdw       | 82          |
| Pro 2                  | Val 80   | 3.7 / vdw       | 82                 | Tyr 82             | 2.67/ hb        | 57          |
| Asp 3                  | Asn 323  | 2.72 / hb       | 40                 | -                  | -               | 8           |
| Phe 4                  | Tyr 82   | 3.3 / vdw       | 42                 | ATP                | 3.6 / vdw       | 58          |
| Pro 5                  | Asn 323  | 3.2 / vdw       | 33                 | -                  | -               | 52          |
| Total buried surface : |          |                 | 570 Å <sup>2</sup> | 324 Å <sup>2</sup> |                 |             |
