# Supplementary material
Source: PubMed Central journal article supplement (PMC3488088)

**Figure S1**

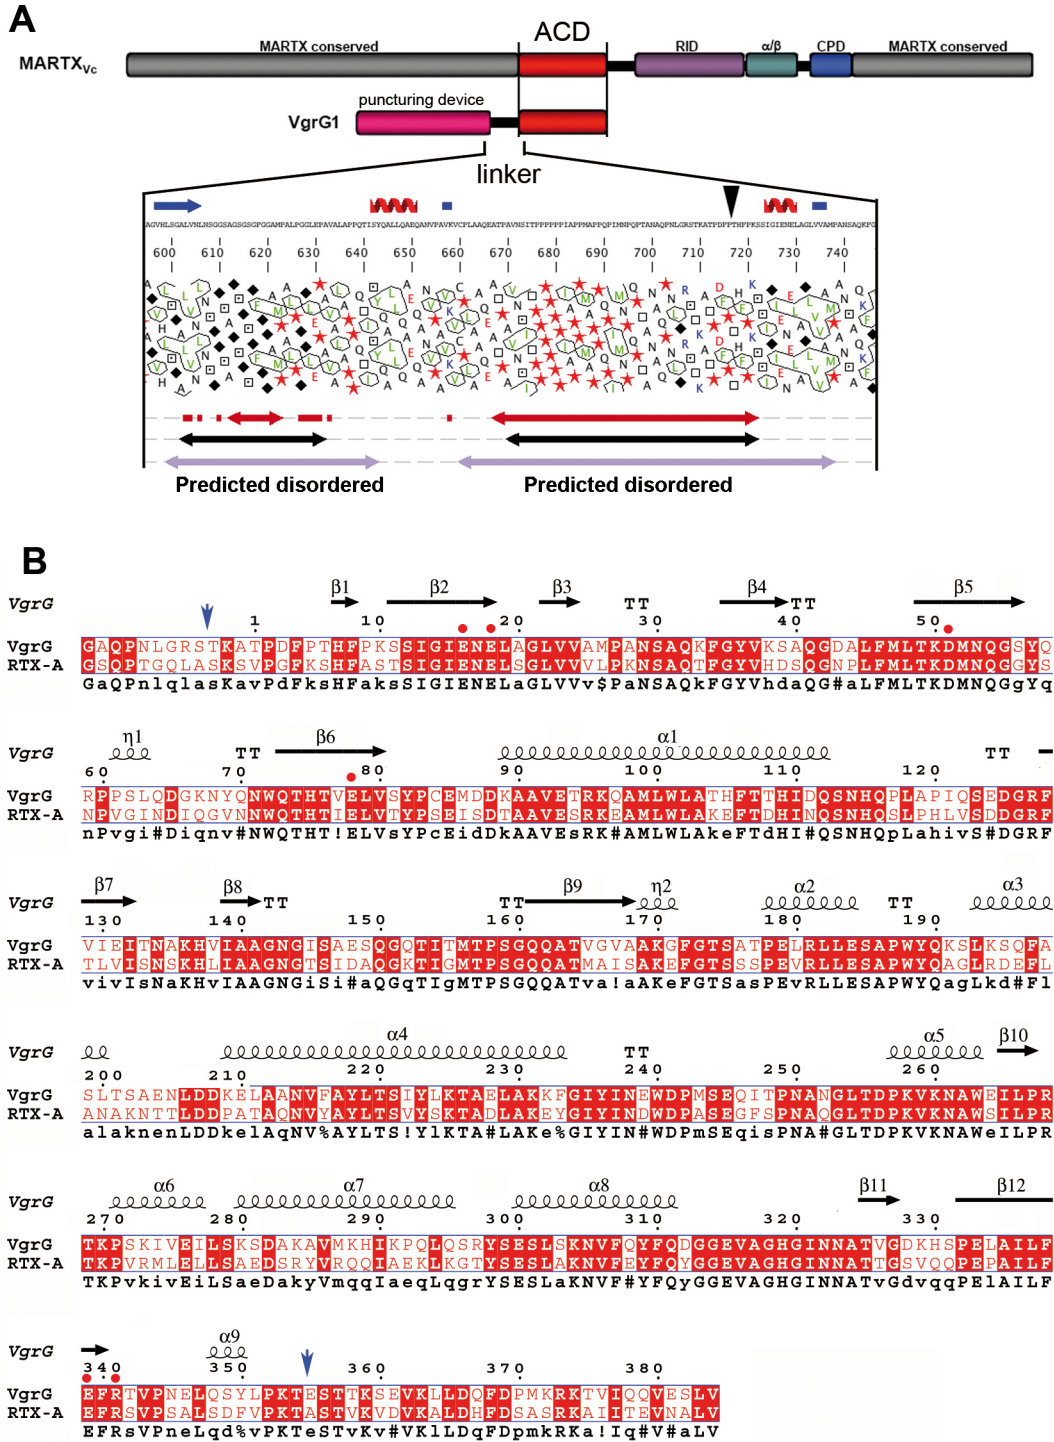

Figure S2

**A**

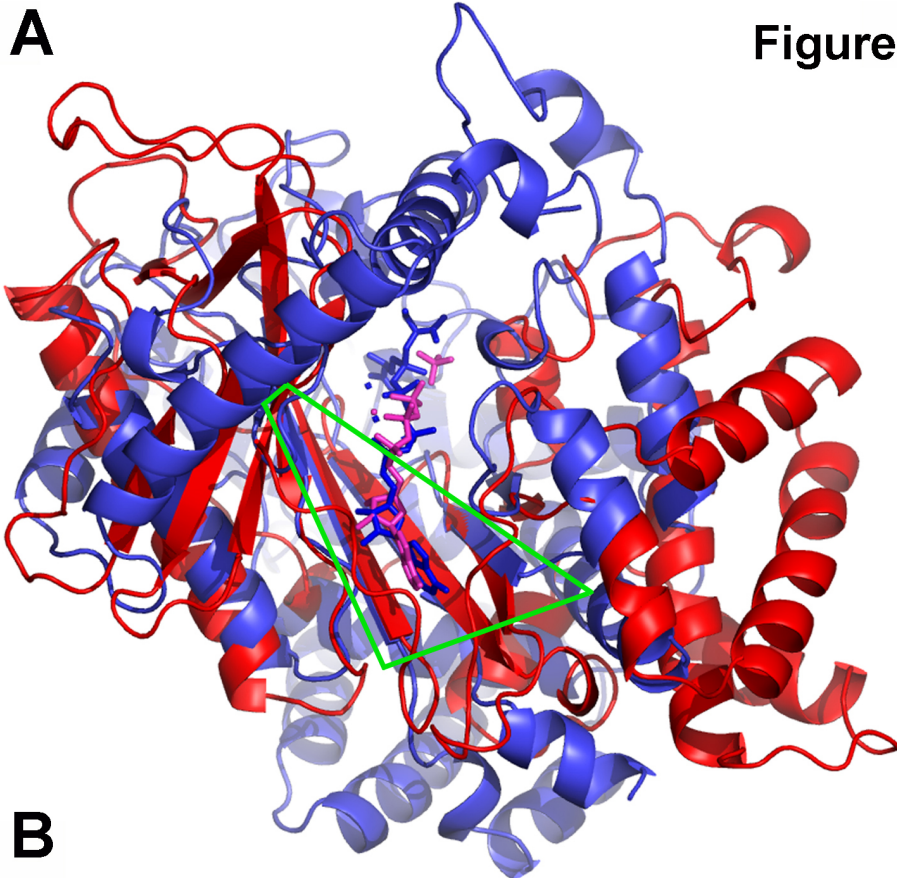

**B**

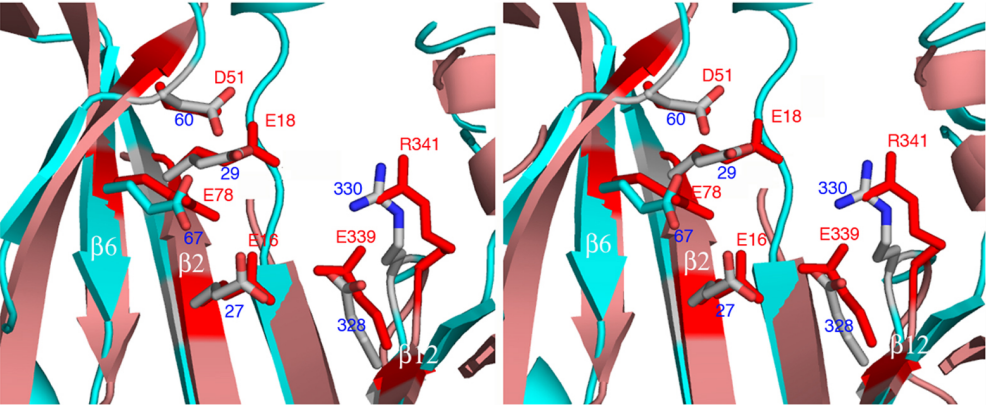

**C**

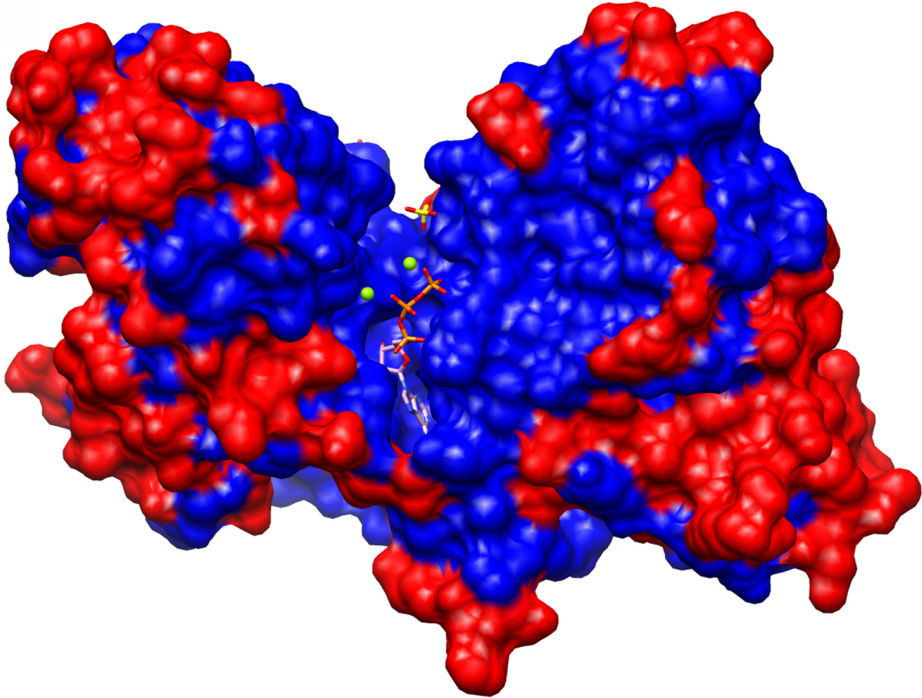

Figure S3

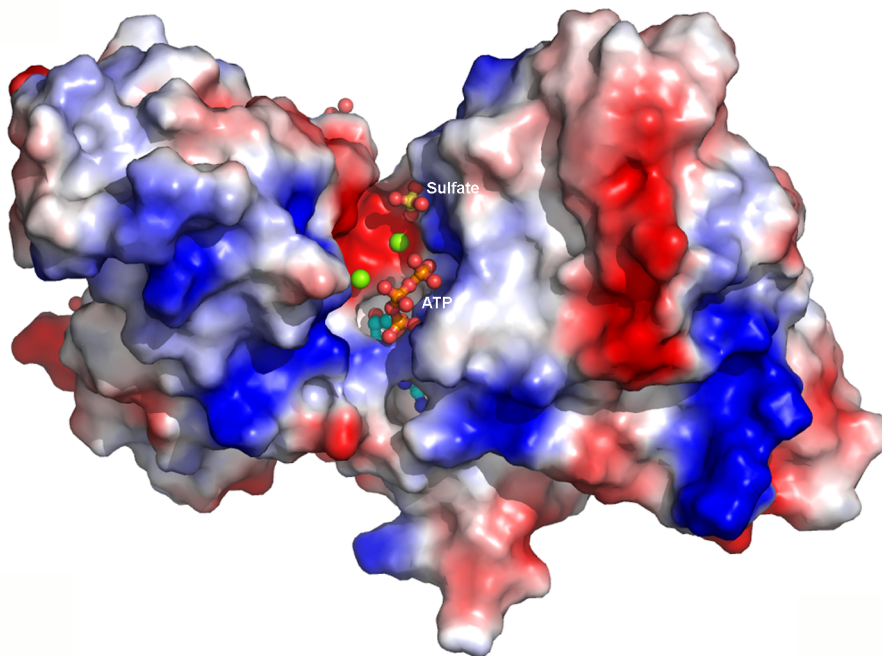



Figure S4

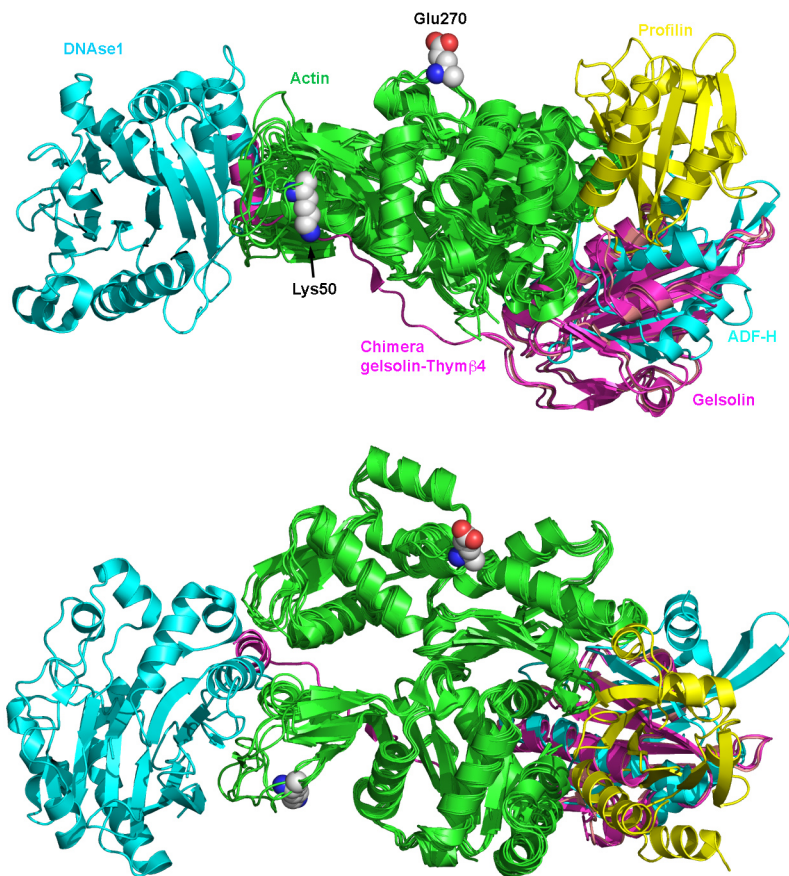

Supplement: supp_M112.390153_jbc.M112.390153-3.pdf [file supp_M112.390153_jbc.M112.390153-3.pdf]
